# Supplementary material for: Association of red cell distribution width with pulmonary arterial hypertension in patients with mixed connective tissue disease
Source: Springer Nature journal article supplement (doi:10.1186/s12890-023-02597-z), 2023-08-14
Supplement: MOESM1 [file 25921388]

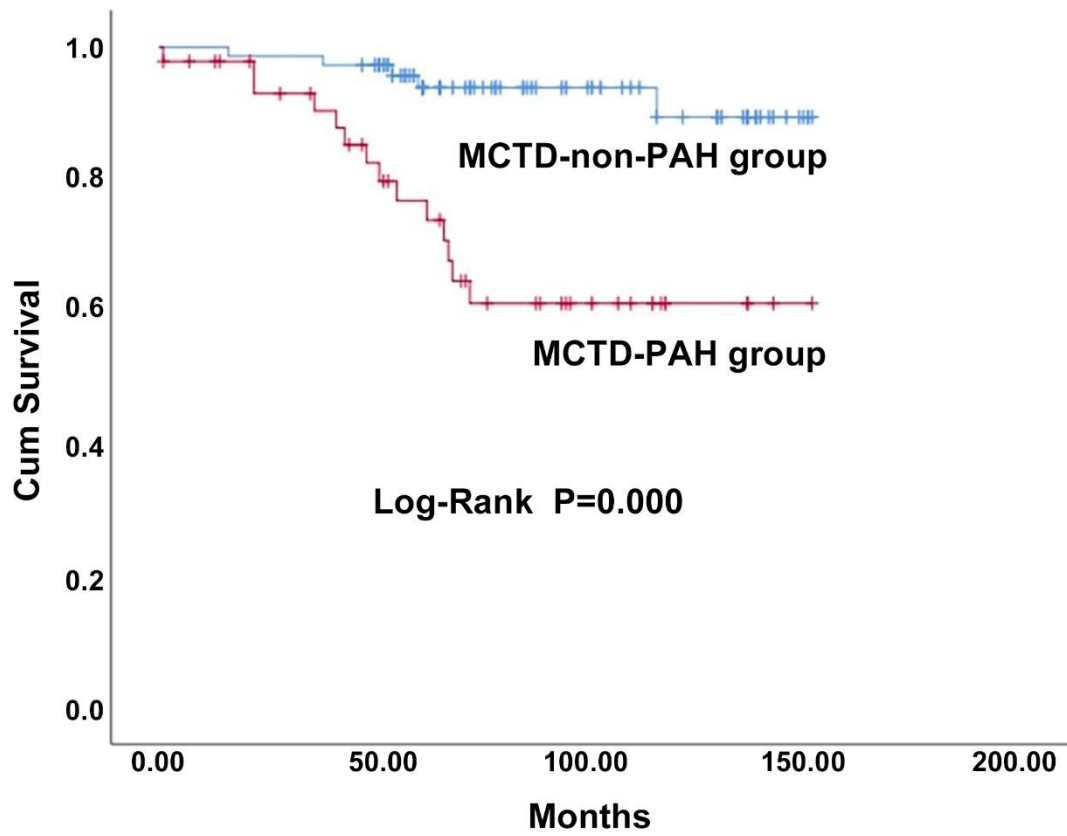

Supplementary Figure S1. Kaplan-Meier survival curves for MCTD-PAH and MCTD-non-PAH patients.

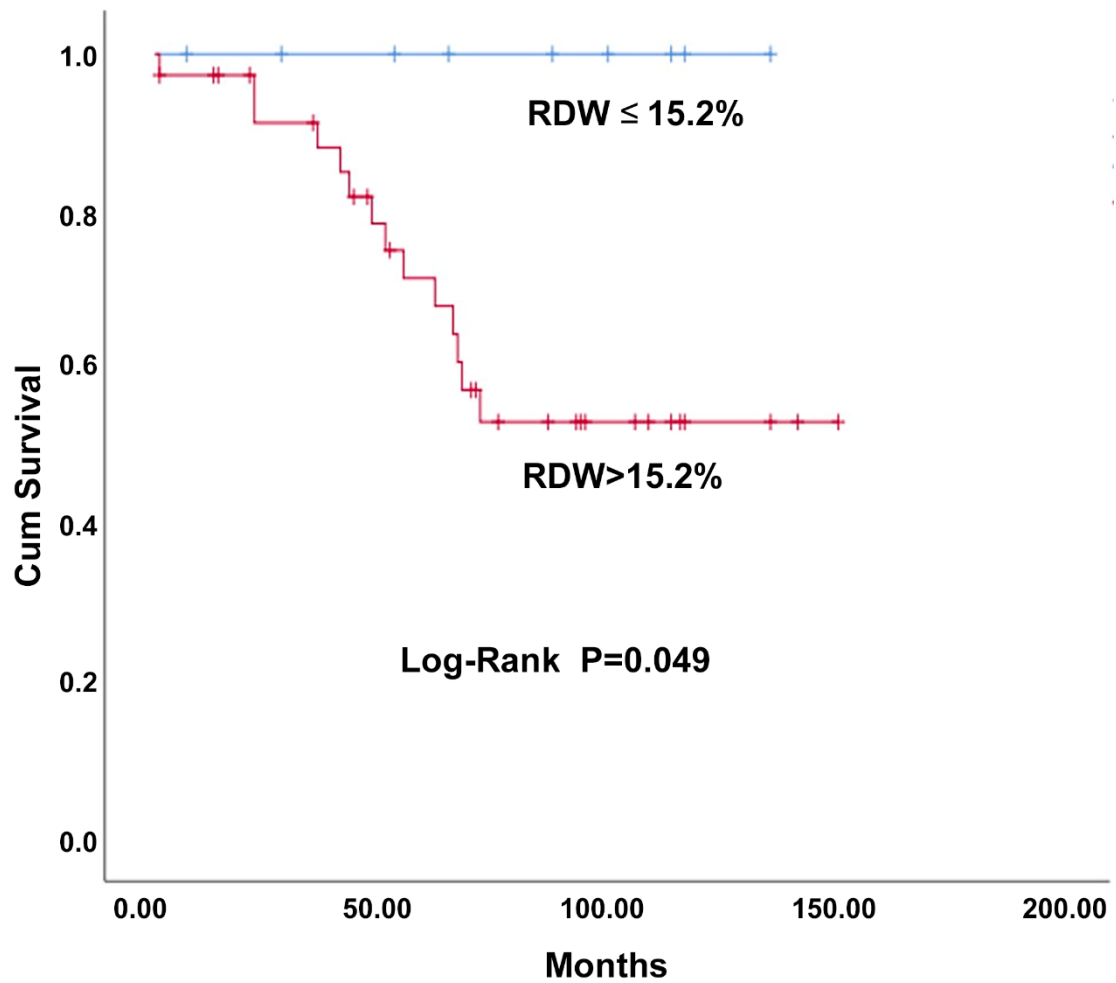

Supplementary Figure S2. Kaplan-Meier survival curves for MCTD-PAH patients stratified by the RDW cutoff value.
